# Supplementary material for: Review in Waste Tire Management—Potential Applications in Mitigating Environmental Pollution
Source: MDPI journal article supplement (doi:10.3390/ma16175771), 2023-08-23
Supplement: s1 [file s1]

**Table S1.** The searching terms used and the total number of publications from each database.

| Databases       | Searching string and searching terms | No of results (article only) | Date of acquisition |
|-----------------|--------------------------------------|------------------------------|---------------------|
| Web of Sciences | Waste tires                          | 5793 (4698)                  | 28/06/2023          |
|                 | Waste tires AND management           | 1015 (804)                   | 28/06/2023          |
|                 | Waste tires AND sorbents             | 78 (70)                      | 28/06/2023          |
|                 | Waste tires AND heavy metals removal | 64 (54)                      | 28/06/2023          |
|                 | Waste tires AND activated carbons    | 504 (441)                    | 28/06/2023          |
|                 | Waste tires AND recycling            | 2010 (1628)                  | 28/06/2023          |
|                 | Used tires AND recycling             | 2291 (1869)                  | 28/06/2023          |
|                 | char AND removal of heavy metals     | 379(337)                     | 28/06/2023          |
|                 | application of tire char             | 95(69)                       | 28/06/2023          |
|                 | char AND removal of pollutants       | 280(252)                     | 28/06/2023          |
|                 | Char sorbents                        | 536(487)                     | 28/06/2023          |
| Science Direct  | Waste tires                          | 37 992(21 417)               | 28/06/2023          |
|                 | Waste tires AND management           | 16 293 (8 896)               | 28/06/2023          |
|                 | Waste tires AND sorbents             | 2 042(788)                   | 28/06/2023          |
|                 | Waste tires AND heavy metals removal | 6 180(2 360)                 | 28/06/2023          |
|                 | Waste tires AND activated carbons    | 9 526(4 087)                 | 28/06/2023          |
|                 | Waste tires AND recycling            | 15 009(7 947)                | 28/06/2023          |
|                 | Used tires AND recycling             | 27 226(15 451)               | 28/06/2023          |
|                 | char AND removal of heavy metals     | 16 334(8 408)                | 28/06/2023          |
|                 | application of tire char             | 8 751(4 487)                 | 28/06/2023          |
|                 | char AND removal of pollutants       | 11 845(6 912)                | 28/06/2023          |
|                 | Char sorbents                        | 9 502(4 959)                 | 28/06/2023          |
| Scopus          | Waste tires                          | 6 785(4 743)                 | 28/06/2023          |
|                 | Waste tires AND management           | 1 110(759)                   | 28/06/2023          |

| Databases | Searching string<br>and searching<br>terms | No of results<br>(article only) | Date of acquisition |
|-----------|--------------------------------------------|---------------------------------|---------------------|
|           | Waste tires AND<br>sorbents                | 71 (58)                         | 28/06/2023          |
|           | Waste tires AND<br>heavy metals<br>removal | 62(44)                          | 28/06/2023          |
|           | Waste tires AND<br>activated carbons       | 347(261)                        | 28/06/2023          |
|           | Waste tires AND<br>recycling               | 1 936(1 324)                    | 28/06/2023          |
|           | Used tires AND<br>recycling                | 3 118(2 154)                    | 28/06/2023          |
|           | char AND removal<br>of heavy metals        | 534(478)                        | 28/06/2023          |
|           | application of tire<br>char                | 96(62)                          | 28/06/2023          |
|           | char AND removal<br>of pollutants          | 1 196(1 108)                    | 28/06/2023          |
|           | Char sorbents                              | 611(499)                        | 28/06/2023          |

**Table S2.** Examples of the application of waste tire rubber in pollution removals from water.

| Adsorbent                                               | Material modification                                                                                                                                    | Initial Conc (mg/l) | Temp (°C)           | pH      | Adsorption capacity (mg/g) | Type of water             | Removal efficiency (%) | References |
|---------------------------------------------------------|----------------------------------------------------------------------------------------------------------------------------------------------------------|---------------------|---------------------|---------|----------------------------|---------------------------|------------------------|------------|
| HEAVY METALS                                            |                                                                                                                                                          |                     |                     |         |                            |                           |                        |            |
| Cu <sup>2+</sup>                                        |                                                                                                                                                          |                     |                     |         |                            |                           |                        |            |
| Crumb Rubber                                            | ground tyre granules purified only by deionized water                                                                                                    | 1 – 50              | Ambient temperature | 1.5 - 7 | 1.50                       | Artificial water solution | 33.0 – 99.8            | [1]        |
| Non-activated rubber                                    | The ground tyre granules                                                                                                                                 | 10-100              | 20-60°C             | 2-5     | 6.54                       | Artificial solution       | -                      | [2]        |
| Chemically activated rubber using 15% ZnCl <sub>2</sub> | The tyre granules impregnation with 15%; carbonization in a fluidized bed under N <sub>2</sub> flow; washed with 1M HCl and rinsing with distilled water |                     |                     |         | 8.84                       |                           | 35%                    |            |

| Adsorbent                                    | Material modification                                                                               | Initial Conc (mg/l) | Temp (°C) | pH | Adsorption capacity (mg/g)                       | Type of water                   | Removal efficiency (%)                    | References |
|----------------------------------------------|-----------------------------------------------------------------------------------------------------|---------------------|-----------|----|--------------------------------------------------|---------------------------------|-------------------------------------------|------------|
| Physically activated rubber                  | Carbonization of tyre granules using N <sub>2</sub> and activation by CO <sub>2</sub>               |                     |           |    | 8.93                                             |                                 | 36.5%                                     |            |
| Scrap tyre                                   | The rubber part (previously washed in water) was pulverized, using an abrader                       |                     |           |    | 34.84                                            | Artificial water solution       |                                           | [3]        |
| Pulverized waste tyres (PWT) mixed with soil | The PWT was washed with distilled water. Dried at ambient temperature and mixed with air-dried soil | 50-1500             | 20°C      | 7  | 1.5 – 2.3 (5 wt.% PWT)<br>0.5 – 1 (100 wt.% PWT) | Synthetic mixing-stock solution | 37.7 (5 wt.% PWT);<br>25.9 (100 wt.% PWT) | [4]        |

| Adsorbent                                                               | Material modification                                                                                                                    | Initial Conc (mg/l) | Temp (°C) | pH  | Adsorption capacity (mg/g) | Type of water                         | Removal efficiency (%) | References |
|-------------------------------------------------------------------------|------------------------------------------------------------------------------------------------------------------------------------------|---------------------|-----------|-----|----------------------------|---------------------------------------|------------------------|------------|
| Pyrolytic tire char activated in situ by PPO (postpyrolysis oxygenated) | The pyrolytic tire char was activated in situ by PPO (postpyrolysis oxygenated) where 7% oxygen (with the balance 93% nitrogen) was used | 25                  | 24°C      | 2-9 | -                          | Artificial water solution             | 71.6%                  | [5]        |
| As <sup>3+</sup> and As <sup>5+</sup>                                   |                                                                                                                                          |                     |           |     |                            |                                       |                        |            |
| carbonized rubber only                                                  | Carbonization under an inert atmosphere using N <sub>2</sub>                                                                             |                     |           |     | 6.95                       |                                       |                        |            |
| Waste tyre rubber modified by polymers                                  | Waste tyre rubber granulate was modified by modifying with poly(3-acrylamidopropyl) trimethylammonium chloride (p(APTMACl))              |                     |           |     | 0.33–0.46                  | Wastewaters containing oil substances |                        | [6]        |

| Adsorbent                                                                                    | Material modification | Initial Conc (mg/l) | Temp (°C) | pH | Adsorption capacity (mg/g) | Type of water             | Removal efficiency (%) | References |
|----------------------------------------------------------------------------------------------|-----------------------|---------------------|-----------|----|----------------------------|---------------------------|------------------------|------------|
| Hg <sup>2+</sup>                                                                             |                       |                     |           |    |                            |                           |                        |            |
| Natural rubber modified by carbon black, 6-PPD, stearic acid, zinc oxide, CBS, TMTD, sulphur | C30CV                 |                     |           |    | 31.19                      | Artificial water solution |                        | [7]        |
|                                                                                              | C30SEV                |                     |           |    | 65.73                      |                           |                        |            |
|                                                                                              | C30EV                 |                     |           |    | 13.34                      |                           |                        |            |
|                                                                                              | C50EV                 |                     |           |    | 0.1529                     |                           |                        |            |
|                                                                                              | C30Z4EV               |                     |           |    | 311.40                     |                           |                        |            |
|                                                                                              | C30Z3EV               |                     |           |    | 1.42                       |                           |                        |            |
| Cd <sup>2+</sup>                                                                             |                       |                     |           |    |                            |                           |                        |            |

| Adsorbent                                                      | Material modification                                     | Initial Conc (mg/l) | Temp (°C) | pH   | Adsorption capacity (mg/g) | Type of water              | Removal efficiency (%) | References |
|----------------------------------------------------------------|-----------------------------------------------------------|---------------------|-----------|------|----------------------------|----------------------------|------------------------|------------|
| Tyre rubber modified with ultrasound at different temperatures | Ultrasound at 30°C                                        |                     |           |      | 0.560                      | Artificial water solution  |                        | [8]        |
|                                                                | Ultrasound at 40°C                                        |                     |           |      | 0.757                      |                            |                        |            |
|                                                                | Ultrasound at 50°C                                        |                     |           |      | 0.814                      |                            |                        |            |
| OTHER IMPURITIES                                               |                                                           |                     |           |      |                            |                            |                        |            |
| Pharmaceutical Compounds                                       |                                                           |                     |           |      |                            |                            |                        |            |
| Waste tire crumb rubber                                        | Waste tire rubber was pulverized and modified by chitosan | 30                  | 25±2°C    | 1-12 | 17.7                       | Drug solution - ibuprofen  | 33%                    | [9]        |
|                                                                |                                                           | 40                  |           |      | 70.0                       | Drug solution - diclofenac | 78%                    |            |

[illegible]



| Adsorbent                                                       | Material modification                                                                                       | Initial Conc (mg/l) | Temp (°C) | pH | Adsorption capacity (mg/g)  | Type of water                             | Removal efficiency (%) | References |
|-----------------------------------------------------------------|-------------------------------------------------------------------------------------------------------------|---------------------|-----------|----|-----------------------------|-------------------------------------------|------------------------|------------|
| waste tire rubber char prepared by carbonization at 773 K (2 h) | Shredded tire rubber were pyrolysed in a muffle furnace under flowing nitrogen                              | 50-1200             | 29°C      | -  | q <sub>e</sub> =0.15 mmol/g | The solution of dye (Acid Yellow 117)     | -                      | [11]       |
| Crumb rubber                                                    | Waste tire was washed with water, dried and cut into small size pieces with size of 2, 4, and 6 mm diameter | 2500                | -         | -  | -                           | The artificial solution of cresol red dye | 69-72%                 | [12]       |

| Adsorbent                    | Material modification               | Initial Conc (mg/l) | Temp (°C) | pH | Adsorption capacity (mg/g)                                                                                     | Type of water      | Removal efficiency (%)                                                            | References |
|------------------------------|-------------------------------------|---------------------|-----------|----|----------------------------------------------------------------------------------------------------------------|--------------------|-----------------------------------------------------------------------------------|------------|
| PWT (pulverised waste tires) | Pulverised to a different fraction  |                     |           |    | uptake capacities for xylene, ethylbenzene, toluene, and benzene were 526, 377, 207 and 127 µg/g, respectively | Artificial mixture | for xylene, ethylbenzene, toluene and benzene at 96, 93, 83 and 78%, respectively | [4]        |
| PWT with soil                | PWT (0, 5, 10, 15, 25, and 100 wt%) |                     |           |    | 5-25% lower than in case of pure PWT                                                                           | Artificial mixture | 5-25% lower than in case of pure PWT                                              | [4]        |

## References

1. Calisir, F.; Roman, F.R.; Alamo, L.; Perales, O.; Arocha, M.A.; Akman, S. Removal of Cu ( II ) from Aqueous Solutions by Recycled Tire Rubber. *DES* **2009**, 249, 515–518, doi:10.1016/j.desal.2008.07.029.
2. Al-Asheh, S.; Banat, F. Adsorption of Copper Ions on to Tyre Rubber. *Adsorpt. Sci. Technol.* **2000**, 18, 685–700, doi:10.1260/0263617001493738.
3. Oladoja, N.A.; Ofomaja, A.E.; Idiaghe, J.A.; Akinlabi, A.K.; Egbon, E.E. Sorption of Cu (II) Ion from Aqueous Solution by Scrap Tyre. *Desalin. Water Treat.* **2010**, 16, 83–94, doi:10.5004/dwt.2010.1071.
4. Shahrokhi-Shahraki, R.; Kwon, P.S.; Park, J.; O'Kelly, B.C.; Rezania, S. BTEX and Heavy Metals Removal Using Pulverized Waste Tires in Engineered Fill Materials. *Chemosphere* **2020**, 242, 125281, doi:10.1016/j.chemosphere.2019.125281.
5. Quek, A.; Zhao, X.-S.; Balasubramanian, R. Mechanistic Insights into Copper Removal by Pyrolytic Tire Char through Equilibrium Studies. *Ind. Eng. Chem. Res.* **2010**, 49, 4528–4534, doi:10.1021/ie901289e.
6. Imyim, A.; Sirithaweessit, T.; Ruangpornvisuti, V. Arsenite and Arsenate Removal from Wastewater Using Cationic Polymer-Modified Waste Tyre Rubber.

- J. Environ. Manage.* **2016**, 166, 574–578, doi:10.1016/j.jenvman.2015.11.005.
7. Danwanichakul, P.; Dechojarasri, D.; Meesumrit, S.; Swangwareesakul, S. Influence of Sulfur-Crosslinking in Vulcanized Rubber Chips on Mercury(II) Removal from Contaminated Water. *J. Hazard. Mater.* **2008**, 154, 1–8, doi:10.1016/j.jhazmat.2007.09.093.
  8. Entezari, M.H.; Ghows, N.; Chamsaz, M. Ultrasound Facilitates and Improves Removal of Cd(II) from Aqueous Solution by the Discarded Tire Rubber. *J. Hazard. Mater.* **2006**, 131, 84–89, doi:10.1016/j.jhazmat.2005.09.007.
  9. Phasuphan, W.; Praphairaksit, N.; Imyim, A. Removal of Ibuprofen, Diclofenac, and Naproxen from Water Using Chitosan-Modified Waste Tire Crumb Rubber. *J. Mol. Liq.* **2019**, 294, 111554, doi:10.1016/j.molliq.2019.111554.
  10. Babiker, E.; Al-Ghouti, M.A.; Zouari, N.; McKay, G. Removal of Boron from Water Using Adsorbents Derived from Waste Tire Rubber. *J. Environ. Chem. Eng.* **2019**, 7, 102948, doi:10.1016/j.jece.2019.102948.
  11. Mui, E.L.K.; Cheung, W.H.; McKay, G. Tyre Char Preparation from Waste Tyre Rubber for Dye Removal from Effluents. *J. Hazard. Mater.* **2010**, 175, 151–158, doi:10.1016/j.jhazmat.2009.09.142.
  12. Badr Khudhair, A.; Musa, M.; Mohd Jaafar, M.S.; Hadibarata, T. Cresol Red Dye Removal Using Recycled Waste Tire Rubber. *Int. J. Eng. Res. Africa* **2015**, 16, 57–63, doi:10.4028/www.scientific.net/JERA.16.57.
